# Supplementary material for: Ibuprofen alters epoxide hydrolase activity and epoxy-oxylipin metabolites associated with different metabolic pathways in murine livers
Source: Research Square preprint supplement (doi:10.21203/rs.3.rs-109297/v1), 2020-11-30
Supplement: Supplementary file 2 [file 94cbc8a1c8c8409656d9c7ba.xlsx]

## Sheet: FemaleReport
Sample ID	Group	6-keto-PGF1a	TXB2	9,12,13-TriHOME	9,10,13-TriHOME	PGF2a	PGE2	PGD2	LXA4	15,16-DiHODE	8,15-DiHETE	9,10-DiHODE	12,13-DiHODE	17,18-DiHETE	14,15-DiHETE	11,12-DiHETE	12,13-DiHOME	9,10-DiHOME	19,20-DiHDPE	14,15-DiHETrE	16,17-DiHDPE	11,12-DiHETrE	13,14-DiHDPE	9-HOTrE	10,11-DiHDPE	8,9-DiHETrE	EKODE	13-HOTrE	15-deoxy-PGJ2	7,8-DiHDPE	20-HETE	15-HEPE	5,6-DiHETrE	8-HEPE	12-HEPE	5-HEPE	4,5-DiHDPE	13-HODE	9-HODE	15(16)-EpODE	15-HETE	9(10)-EpODE	17(18)-EpETE	17-HDoHE	11-HETE	12(13)-EpODE	13-oxo-ODE	15-oxo-ETE	9-oxo-ODE
IB-1	IB	1.33526	4.395	1088.85	685.411	1.17437	0.785666	0.469466	2.87078	42.3188	12.6285	1.51137	2.29233	11.101	4.54909	1.81563	162.99	31.0134	63.7754	48.1163	12.5459	25.777	5.45857	24.2554	4.79116	15.2056	53.56	34.8207	25.1048	2.39558	1.18035	14.5439	3.10259	10.3544	35.7109	7.63967	1.86019	1243.11	1162.44	11.3589	344.261	5.10695	2.18306	61.201	192.578	2.77848	7.92184	29.7226	169.251
IB-2	IB	15.0883	5.59	1694.76	962.452	1.97322	0.291884	1.1321	5.03949	40.006	23.8141	1.55633	3.41237	8.77534	4.47458	1.78521	139.102	36.9311	44.3831	37.0211	12.9179	18.4491	4.95042	64.4724	4.22875	15.5089	74.823	91.2008	27.4566	2.59455	1.53452	63.889	3.27187	19.8601	137.038	20.9056	1.22128	2269.92	1901.91	16.0378	667.17	5.29652	2.56614	220.332	405.149	3.11699	9.26041	47.692	291.264
IB-3	IB	2.43151	11.0154	1957.65	1174.8	2.61014	0.517215	1.14514	2.56289	16.6998	5.17192	0.536305	0.79972	12.2169	4.0247	1.69051	115.186	26.451	65.2194	52.1058	12.0091	28.5811	5.19107	39.2371	4.86131	17.6265	12.9736	92.881	55.0448	2.49132	1.83267	1171.95	0.671163	62.9355	5268.81	17.9222	0.0466752	1871.5	1489.5	2.68668	19518	0.953067	0.740083	8571.23	11649.7	1.9971	0.847725	40.4532	249.251
IB-4	IB	8.3491	5.57824	881.071	570.56	0.972283	1.12016	0.997601	3.16616	54.9057	20.65	1.47378	2.38366	10.1458	3.63422	1.42383	128.062	29.5077	66.6464	37.628	13.0343	21.6909	6.8166	37.2012	5.60681	14.9894	38.5713	69.2338	20.0361	2.53843	2.09992	40.9602	3.03392	31.4195	185.181	18.4867	5.56625	2041.29	1611.77	25.9743	697.801	9.77716	5.49505	120.399	387.363	6.92695	9.7768	21.5677	228.248
IB-5	IB	10.0723	6.72444	805.313	481.423	3.91988	1.47341	0.865136	2.39333	44.6285	16.9394	1.56869	2.83611	13.3992	5.14052	1.80489	136.385	26.8414	84.8428	51.199	17.512	25.4391	9.26053	17.996	6.31302	14.2907	23.1075	38.3022	18.1851	2.23107	1.68417	15.0452	3.85902	8.51425	35.409	7.76781	11.4571	1405.61	911.125	7.16748	409.237	3.0682	1.74655	56.4558	149.514	1.75384	3.67388	13.7947	86.6142
IB-6	IB	9.11882	17.4222	2418.55	1234.67	2.16652	1.25524	1.01947	3.25148	122.189	16.8471	2.23462	4.20558	12.3616	4.97388	1.70581	211.536	41.1598	79.3525	57.6459	14.2489	25.2113	5.50132	51.0065	5.08477	16.8543	92.2333	196.883	61.7778	2.31823	1.43565	96.5701	2.83601	25.8035	153.3	15.1463	1.8715	2122.33	1088.16	27.6279	1156.49	5.48339	1.93243	352.893	636.61	4.16977	12.1867	55.7653	295.756
IB-7	IB	3.16424	2.4376	915.152	504.475	0.885983	0.597065	0.649957	1.81684	43.965	21.3555	1.72462	3.45853	13.3732	6.60328	2.29686	126.924	27.5498	57.2384	66.4683	17.1656	26.7534	6.67616	10.2202	2.85082	7.60633	11.3138	22.4584	29.608	1.62214	2.35866	13.0138	3.04404	2.61219	35.1379	7.08945	11.3113	1594.9	832.813	5.76845	608.02	2.0601	1.21594	60.7037	237.044	1.37339	3.3551	16.6975	89.4806
IB-8	IB	3.61874	4.67496	878.675	485.75	0.86967	0.533663	0.830563	1.7147	34.8234	13.9433	1.22771	2.29257	12.2487	4.91776	1.7775	111.904	20.4614	43.6508	34.1305	9.37497	15.6496	4.06985	9.30996	3.09658	9.7371	13.474	17.1089	24.1284	1.69628	2.0278	14.7488	2.69404	9.51837	59.5396	7.63198	3.90693	999.535	514.642	9.7999	526.223	3.86145	2.57134	62.0185	210.715	2.26293	3.78946	16.711	82.8322
IB-9	IB	8.9512	4.85763	732.631	418.868	1.17607	0.519601	0.825682	2.60961	45.7551	10.0838	1.89778	2.71836	30.1707	12.1131	6.40778	142.945	36.0891	90.2313	76.8694	21.278	44.0826	14.3369	13.6153	9.62604	20.4987	25.3168	37.7146	18.3535	2.60769	2.09136	24.3127	4.66906	21.0121	88.3228	10.1771	12.211	1111.18	568.084	15.3841	434.58	6.1423	4.61989	82.5862	158.889	3.56513	7.01092	27.4823	113.003
IB-10	IB	0.40317	2.95462	655.505	400.462	1.65178	0.555131	0.520837	2.50922	40.4089	11.0846	1.55904	2.24079	15.8737	6.31979	2.89364	78.6492	20.4879	51.3625	39.4105	19.7365	28.8199	9.47856	15.8875	4.65834	10.6669	9.01309	13.6579	21.6158	1.99695	1.25721	27.6764	2.33973	8.66457	208.238	10.9605	4.38341	1075.12	517.952	8.14709	1034.16	2.49124	1.16037	207.195	358.607	2.01137	2.11598	15.1529	76.9398
IB-11	IB	8.97428	3.47904	1051.97	603.789	2.4357	0.716505	1.56766	2.75347	28.9448	24.4136	1.70236	2.28563	19.1833	6.32473	2.80522	108.956	29.5213	84.8304	72.1754	19.6804	34.7577	9.98569	16.0361	6.22196	17.6736	27.1441	18.4217	22.7261	2.49159	2.45631	14.4396	4.99089	0.388812	107.945	9.0047	7.19208	1342.84	683.538	4.1952	711.411	1.72096	1.09708	78.8837	245.209	1.05414	0.539265	29.0035	88.9378
IB-12	IB	10.4669	4.68847	14997.6	7862.73	3.183	0.79303	2.135	11.5744	44.9684	12.1307	1.42488	1.96562	17.5633	3.77833	2.06147	129.939	25.4827	131.646	93.8349	29.5301	39.8445	16.1215	20.7951	9.25239	20.1179	8.28862	33.6005	46.6811	2.86034	4.44472	337.046	1.3167	8.93919	1946.31	20.3137	0.724333	1358.88	628.837	7.4571	5451.47	2.21729	0.605523	1477.13	2231.08	2.21396	4.80763	34.1486	81.6558
IB-13	IB	2.70649	3.69809	681.317	388.427	1.97796	0.343279	1.08201	1.70965	34.241	13.2833	1.32313	2.22052	13.0497	5.59076	1.96037	101.971	23.2983	50.9889	52.8652	16.0008	28.7573	8.64787	10.9681	3.94031	11.1831	11.8158	14.1814	37.5434	1.8393	1.76833	17.9631	2.58374	3.9387	21.4436	8.49104	4.59356	1048.78	525.282	5.06141	577.153	1.95561	1.14851	66.5859	191.298	1.25703	1.58457	13.7017	58.666
IB-14	IB	1.00807	4.64816	819.162	489.593	1.31923	0.374627	0.878528	4.01977	35.1216	3.88389	1.37888	2.07239	10.6091	4.50962	1.76728	113.851	20.8814	60.022	37.9123	15.3639	18.9369	6.39829	10.7984	3.93205	10.2918	20.3353	11.9671	13.4556	2.04889	1.14461	12.1644	3.1838	21.6093	52.0089	7.74105	7.50872	762.459	392.147	27.7942	364.645	12.9319	6.5366	60.3209	91.1023	7.88843	6.72691	16.9219	68.9374
IB-15	IB	1.19634	5.16659	1572.94	822.449	1.24504	0.539364	1.10895	3.50533	37.9361	9.976	0.847161	1.58003	17.0681	7.14692	3.05146	104.361	19.6552	87.4989	69.9079	19.8383	35.0166	11.6206	14.4693	6.65144	13.6516	26.2298	15.8061	35.6803	1.69322	2.97465	21.7094	2.71155	20.7263	30.7781	12.8011	5.3833	1426.21	783.229	12.5344	674.796	5.75399	4.75704	74.5783	239.113	3.05478	4.17345	28.9673	107.22
C-1	CTR	114.832	10.6187	891.188	545.481	7.41877	1.0499	2.78992	2.02421	90.7921	8.41204	2.17616	3.85237	9.23168	3.33215	1.67747	164.807	30.3851	39.7031	39.2931	8.56184	14.0876	3.29455	29.0049	2.85904	9.41237	55.511	46.539	29.1624	1.35992	1.10562	31.0504	1.82763	16.0336	6.93473	17.3536	1.78602	1158.16	568.811	42.1433	348.765	8.56734	4.12794	107.045	190.879	6.59165	9.42036	24.2024	319.64
C-2	CTR	107.567	27.8916	1477.14	800.349	45.5011	4.16525	9.1924	2.90376	26.4851	10.3102	1.62394	2.01546	8.92249	4.51567	1.23103	118.841	25.819	71.8244	44.5346	14.8958	16.6953	6.13575	17.3283	3.65687	8.79849	31.6193	33.3218	28.3769	1.77369	2.08529	17.3857	3.1452	12.2224	11.9727	11.4382	12.8848	1837.48	1109.84	10.5489	561.321	5.33925	2.34315	74.5527	195.347	3.16467	5.24531	27.976	169.436
C-3	CTR	14.7359	6.68644	6008.81	3264.76	2.1923	0.840155	2.46015	3.76605	22.138	6.48178	1.30311	2.15475	6.89304	3.22135	1.29328	146.656	26.7054	30.3644	29.0874	8.05181	12.3728	4.06877	22.4584	3.03231	8.18499	40.4442	22.637	17.1967	1.07845	2.17501	137.48	1.34417	25.4597	143.25	46.1701	0.435635	1070.95	685.735	26.2022	1486.16	3.92647	2.82889	842.821	836.887	3.0413	3.45641	21.9443	234.415
C-4	CTR	215.121	42.7302	4363.72	2250.89	42.4013	5.76172	9.5962	6.72386	34.6872	9.72389	1.49453	3.04154	10.2788	3.96486	1.49691	138.552	19.9698	62.2802	47.9697	15.7407	19.2308	7.28902	15.438	3.66825	9.92185	25.9605	33.8011	16.4925	1.66495	2.06592	88.7655	1.64837	38.9958	1015.14	28.503	2.98046	1494.05	889.572	6.37339	2054.58	3.05355	1.38299	580.208	937.101	1.72233	2.5497	23.4342	192.875
C-5	CTR	179.672	40.0674	874.36	472.616	59.4022	5.87126	15.0587	1.65192	42.5461	15.0291	1.31747	2.38455	15.5564	5.3734	1.79394	138.955	27.7274	69.5626	42.7818	18.7893	20.7913	8.35801	14.1395	4.34638	10.6196	37.2123	25.4621	19.0874	2.49122	0.909748	21.7589	2.95935	12.6804	54.7203	11.803	20.6038	1586.66	976.777	18.5551	513.934	7.21287	3.5357	143.619	215.03	4.57407	6.28144	23.3992	187.407
C-6	CTR	352.072	61.4624	2566.06	1402.85	95.5486	9.46568	18.9953	4.96612	81.3825	34.4591	2.85131	4.67399	14.4221	5.39637	1.96613	231.842	57.4537	66.2905	41.064	20.0572	31.6839	9.88568	30.9628	6.98851	21.5041	43.6599	48.5833	24.8373	3.3276	1.88352	41.9583	5.0899	56.076	219.198	19.2009	10.4192	2331.14	1388.48	76.2728	1214.59	32.9909	15.6373	147.12	669.386	19.3558	20.6645	29.8091	156.983
C-7	CTR	289.195	63.5883	999.192	606.121	85.1071	7.77213	13.5707	2.1465	54.0217	13.8402	2.22932	5.06685	10.4906	3.22451	1.46437	127.662	25.8752	51.6838	38.6516	15.0456	20.0384	5.78588	19.8572	3.65702	11.6353	19.0472	33.9058	30.7931	1.82055	1.29507	23.1375	1.9475	0.150479	126.317	11.6578	7.57832	1436.93	610.906	15.7918	759.828	3.27841	1.92438	174.206	367.261	2.05637	1.60659	32.0956	125.965
C-8	CTR	94.7464	7.16455	6907.88	3454.06	3.39393	2.86498	2.40792	9.40677	78.2277	39.3355	4.87705	8.79231	21.9788	7.22258	3.09516	351.215	114.97	86.2555	53.4066	25.3195	26.2702	9.45741	135.464	9.38417	23.865	80.3477	172.193	59.8398	3.44658	2.04788	170.983	4.13821	1.10323	408.532	37.5619	2.31752	5152.86	2889.09	40.8567	3055.36	4.59159	2.05944	1239.27	1555.18	3.37885	12.9127	90.9855	725.379
C-9	CTR	276.79	68.3459	850.13	492.157	106.556	10.3624	23.0764	2.46016	36.9512	16.3774	0.846633	1.57867	13.4602	4.2379	1.65871	92.1721	16.4201	38.8865	36.8717	12.9331	21.2677	6.85995	9.65281	4.16707	10.6355	22.9007	10.4546	27.9538	1.60868	1.02861	17.6954	3.18483	3.83093	80.4785	9.86085	11.4931	1213.75	740.647	8.339	861.844	3.4047	2.84133	50.3547	371.611	1.74961	2.01017	23.5813	90.3143
C-10	CTR	150.909	33.1947	1148.47	624.025	76.3465	7.41388	11.9647	2.82439	53.2963	11.6819	2.53139	3.19838	18.32	10.6045	3.37614	149.111	39.1233	114.48	130.192	38.394	50.716	16.3748	13.4599	6.90336	14.9662	52.073	19.0071	28.8701	2.83809	4.05276	12.9435	4.25316	0.298452	44.8591	9.66416	43.1133	1552.6	862.874	13.1742	635.916	5.84864	3.00355	51.8045	232.991	3.93466	3.35709	31.1358	117.432
C-11	CTR	133.745	22.1548	891.38	507.65	38.1093	5.11396	9.21367	1.66884	44.7901	5.50281	1.09557	2.37886	9.34205	3.28963	1.65383	92.1828	16.9401	46.8673	37.544	9.32458	18.7253	5.14328	9.9626	2.58551	6.75384	27.7256	16.5842	36.3687	0.863281	1.13826	10.0071	1.51481	7.73994e-07	278.731	6.0148	4.87205	985.319	528.296	10.0045	408.505	3.37235	1.28626	33.2907	181.466	1.87211	1.70152	17.0632	79.6149
C-12	CTR	273.517	90.1534	643.997	348.39	149.143	11.2998	26.4337	1.73161	39.6507	9.29038	1.38789	2.24011	11.5571	4.11323	1.61627	103.925	25.2204	75.1371	57.5983	16.0462	21.5276	9.37141	8.50022	4.93817	10.7831	15.1969	12.4006	36.0359	1.97278	1.69911	10.6071	3.1204	5.99943	212.598	7.66198	34.7398	1098.59	652.218	11.403	530.367	5.25253	2.31698	33.5817	258.82	2.30844	3.24447	15.2077	60.0844
[truncated: 21 more columns]

## Sheet: MaleReport
Sample ID	Group	6-keto-PGF1a	TXB2	PGF2a	PGE2	PGD2	LXA4	15,16-DiHODE	8,15-DiHETE	9,10-DiHODE	12,13-DiHODE	17,18-DiHETE	14,15-DiHETE	11,12-DiHETE	12,13-DiHOME	9,10-DiHOME	19,20-DiHDPE	14,15-DiHETrE	16,17-DiHDPE	11,12-DiHETrE	13,14-DiHDPE	9-HOTrE	10,11-DiHDPE	8,9-DiHETrE	EKODE	13-HOTrE	15-deoxy-PGJ2	20-HETE	15-HEPE	5,6-DiHETrE	8-HEPE	12-HEPE	5-HEPE	4,5-DiHDPE	13-HODE	9-HODE	15(16)-EpODE	15-HETE	9(10)-EpODE	17(18)-EpETE	17-HDoHE	11-HETE	12(13)-EpODE	15-oxo-ETE	9-oxo-ODE	14(15)-EpETE	8-HETE	12-HETE	11(12)-EpETE
C-1	CTR	393.235	41.8838	46.6931	34.5149	23.5117	3.84462	372.327	15.2694	32.4756	73.9684	12.2929	4.98607	1.52399	974.271	218.066	80.4555	72.4116	24.6302	24.4528	8.44839	120.296	5.66656	15.439	55.5231	109.623	61.07	3.14491	16.3558	6.36318	12.5818	306.763	22.8454	10.3593	3905.14	2920.12	120.107	588.807	26.9414	7.03697	151.741	221.21	16.0494	22.8032	224.485	5.99746	72.1194	357.407	3.20924
C-2	CTR	135.484	51.0511	96.1886	5.45828	12.28	1.50808	21.2256	5.33302	3.67322	1.91352	12.7819	7.45872	3.14044	101.024	46.9219	61.0573	69.4258	15.0047	29.7465	5.40787	11.5293	4.91955	14.6547	9.98267	10.7815	58.5944	6.26081	4.39858	6.41712	8.88824	58.0783	3.90699	101.078	1112.54	882.85	10.8638	200.149	5.99522	2.81899	42.8928	94.5022	3.246	5.24232	40.501	1.05485e-06	15.8949	346.13	0.845941
C-3	CTR	111.632	31.1388	39.3485	2.82362	8.15639	1.39137	18.8581	10.1352	1.00297	1.90444	8.8538	3.06595	1.13811	82.1557	13.2977	42.0884	24.4038	11.4934	8.25678	3.45657	12.549	1.73596	3.17851	6.11099	14.3744	27.0128	1.31459	7.28434	1.26385	0.639879	28.4356	4.92974	11.2676	1164.48	848.139	3.88711	189.654	1.4573	0.854647	46.8754	83.4548	0.829239	3.17363	36.9777	0.792781	15.5691	114.811	0.200788
C-4	CTR	91.3139	23.3266	50.0601	1.86567	7.61164	1.82484	16.8086	4.23217	1.17843	1.55245	11.7707	5.00043	1.63635	82.6409	18.9317	48.3188	39.9451	13.1265	14.3427	4.40509	7.96752	2.84748	6.5717	7.6212	8.33078	34.1462	4.03541	4.22015	2.76917	9.98004e-07	0.489737	4.21188	13.7625	764.574	609.506	1.72054	146.802	0.600089	0.524433	21.8787	64.0227	0.46281	3.43166	34.2776	0.0323533	12.3651	192.547	0.0496266
C-5	CTR	79.3472	25.4601	52.7377	3.1062	6.65493	1.61914	18.2304	6.94463	0.556264	0.96271	7.2289	3.06998	0.932999	77.6046	14.1487	51.5799	30.861	11.7292	10.0463	3.42329	9.67519	1.53961	3.59569	5.1889	8.61215	41.425	2.01748	5.47519	2.1669	10.9722	153.83	6.36054	26.6418	828.519	644.288	12.7803	158.932	6.21116	3.46063	29.5935	77.4456	3.65916	3.63378	29.1973	2.77148	20.4237	290.161	1.38939
C-6	CTR	68.2478	17.3045	26.0601	1.38131	3.47002	1.26867	20.4008	3.6223	1.14876	2.09135	8.3229	3.78691	1.30412	80.0668	15.8313	37.1571	29.2565	8.9922	6.8106	2.35406	7.86144	1.7753	3.94559	5.41772	9.8725	34.0494	1.42536	5.80997	1.71064	8.44862	192.306	3.84612	10.7418	724.984	491.81	13.3492	156.602	6.41536	2.6439	25.1506	68.0573	4.11517	2.817	37.916	2.43802	20.4852	144.457	1.3496
C-7	CTR	69.2757	10.9667	18.8331	1.5923	5.19867	2.13582	17.4851	12.9462	0.72728	1.67125	8.88133	3.42076	1.14138	94.7361	18.1613	59.2492	35.6721	11.7705	10.5795	4.17598	15.503	2.18513	4.90339	7.69351	10.0678	38.5018	3.20418	8.02996	2.59181	14.5112	329.479	6.67261	36.8868	1183.61	900.302	16.2641	224.355	8.00264	5.322	47.1388	113.391	5.09789	6.37485	56.8182	4.97969	46.277	154.974	3.05629
C-8	CTR	151.611	25.1811	52.3168	2.1112	11.9525	1.62104	25.4862	7.80465	1.28	2.10284	10.8599	3.88516	1.16656	110.148	20.6546	62.2713	48.6838	14.5961	14.9107	4.17621	11.5693	2.23425	4.67132	7.61817	20.345	28.4991	3.45097	7.8204	2.42493	10.6767	190.044	5.20444	28.0642	1383.76	946.592	16.0186	244.759	8.51821	3.98902	36.9975	107.945	4.97398	4.2017	44.1415	3.56279	34.6253	381.278	2.07908
C-9	CTR	97.1918	37.5668	65.7832	3.83521	11.1024	1.59965	20.9261	9.62137	1.47029	2.18678	9.34194	3.5954	1.19417	117.978	25.6447	60.4089	47.9249	17.9076	17.2143	6.01181	14.3897	2.72938	5.21653	10.9186	8.86022	25.5156	3.04226	5.87991	2.43118	11.3134	88.3159	4.43406	48.671	1747.55	1348.95	15.0839	316.936	7.95686	2.34913	96.1257	136.285	4.06595	8.9129	67.444	1.81471	27.0576	402.616	1.36461
C-10	CTR	111.609	24.1508	67.3354	3.17241	6.85918	1.80508	17.3852	5.32031	0.66191	1.26556	10.4769	3.93569	1.27337	107.785	18.8639	54.8452	50.467	12.5352	15.3547	3.80969	11.2954	2.33135	4.95275	7.07552	10.7511	33.1469	1.1908	7.6602	2.26851	1.41092	11.346	4.83967	21.5623	1206.95	878.918	3.57893	226.133	1.20786	0.43497	51.4739	106.126	0.699605	7.92182	41.919	0.338481	24.5356	471.564	0.138861
C-11	CTR	180.142	52.9974	58.5096	7.59926	17.0003	1.17772	31.4708	6.51319	2.52021	3.76275	8.17934	3.06823	1.21771	124.684	26.8931	44.3872	24.6	8.93305	7.37634	3.04005	12.8601	2.64719	4.43288	7.38962	11.8815	34.8966	2.43819	5.99832	2.03676	6.38453	204.173	3.47821	10.216	1487.29	1106.4	15.3255	215.588	6.86974	1.81558	54.5575	119.182	4.38232	4.72001	44.7425	2.26748	18.2501	289.986	1.35194
C-12	CTR	83.9496	14.0274	19.4197	2.57856	5.91144	2.34252	33.8883	18.0739	2.3107	3.44026	12.4118	5.85623	1.8627	125.176	32.3915	47.8097	36.6555	13.0798	13.5994	5.48801	18.1023	3.76954	6.73725	8.70611	11.8766	54.997	3.51506	6.05155	3.60988	1.61827	54.0557	5.13955	27.7995	1608.91	1034.47	4.90823	338.089	1.56359	1.17327	71.733	129.911	0.80527	3.99802	42.978	0.507367	32.7039	188.898	0.423829
C-13	CTR	218.104	32.5085	83.4637	4.84719	22.492	1.22291	30.6294	8.05375	1.37312	1.98245	12.6486	4.43586	1.56286	139.53	21.1281	67.3496	38.3481	15.4723	13.4356	5.7405	8.10614	3.77552	7.43121	6.56564	7.5678	20.8614	4.86219	6.19051	3.2435	1.51667	4.79209	4.81725	17.3886	1278.57	1000.26	4.06553	274.154	1.12413	0.342396	56.913	164.271	0.895849	4.75093	39.471	0.551332	30.5888	344.319	0.289062
IB1	IB	9.15861	4.13683	1.99297	0.492525	0.706667	1.61252	25.7922	6.34339	1.70562	2.05721	17.8399	8.22378	2.98461	150.11	23.9425	67.1496	51.2386	15.9425	19.6489	6.36176	9.82014	4.36515	10.2673	10.5436	13.6045	41.6818	3.06968	12.4452	5.14716	1.74572	89.6241	8.35527	34.3707	1004.49	594.007	6.17462	233.336	1.77705	2.59215	39.1726	85.8959	1.56872	6.07873	59.5158	1.22992	45.684	672.211	1.46376
IB2	IB	0.889868	2.77843	0.808678	7.29927e-07	0.74052	1.75586	12.5553	7.90655	0.495202	0.901269	10.1865	4.47521	1.515	52.2065	10.9838	38.8388	24.6187	9.17294	8.98662	3.62753	8.29803	2.19897	3.9721	4.60298	5.81721	34.6831	1.20156	4.75482	1.67213	16.2181	456.754	5.36314	8.85345	757.171	388.725	14.7785	243.151	7.47517	5.60057	48.6949	69.9952	4.34179	4.29873	42.2267	5.53409	20.0179	148.734	2.89849
IB3	IB	0.0930055	3.23597	1.42677	0.287506	0.801159	1.96151	25.6604	19.0575	1.63096	2.50697	13.7266	8.27757	2.35057	131.855	30.8876	64.8356	60.9389	21.9503	21.3795	8.69747	12.0989	4.44338	8.00366	8.56168	11.6875	66.6413	3.53086	4.97084	3.69521	3.24607	133.345	6.5141	34.2207	1675.01	891.378	9.20811	490.919	4.46235	3.75435	79.8715	141.206	2.68806	5.14057	46.365	2.51966	29.6076	398.168	1.59486
IB4	IB	3.93772	4.38974	0.723113	9.56023e-07	0.81183	1.93048	29.9741	6.06335	1.47608	1.95416	5.07115	2.35272	0.975854	87.9119	24.6835	40.7331	29.0833	8.17073	10.0912	2.38	4.99632	2.40197	5.34487	9.99333	6.33567	26.5291	6.80848	2.07973	2.75412	2.55279	11.8973	1.54507	15.276	534.454	307.677	4.85786	171.5	1.15196	0.66187	16.0229	40.8377	0.954928	4.03375	29.3518	0.531663	21.1697	426.252	0.326538
IB5	IB	4.71498	4.05157	0.863518	0.100615	0.787357	1.43228	21.1236	7.79136	1.24805	1.80132	15.5225	6.58705	2.50351	103.102	26.9706	75.3889	58.3646	17.6262	16.8617	5.28692	7.24853	5.03444	8.94512	8.35581	15.3492	42.7826	4.55443	7.11686	3.99841	17.3099	613.804	5.58965	25.2037	1060.54	556.729	24.8008	273.887	14.2494	8.37865	51.0609	96.7842	7.87377	5.59313	53.3192	7.64464	36.3222	555.669	1.69283
IB6	IB	2.19158	3.04016	0.612116	7.88644e-07	0.254387	1.02264	13.2065	7.65086	0.501527	1.00189	8.8578	3.41271	1.30289	66.4584	12.4043	36.8778	27.6896	8.5851	11.1845	3.60587	6.9764	2.31511	4.6834	5.83653	5.18621	24.1446	0.78581	4.07753	1.72164	17.5837	396.778	4.5373	8.56512	722.504	445.859	16.2354	175.436	8.2804	5.38166	45.4652	66.8778	4.63971	5.46184	38.5087	5.63508	20.0264	189.153	2.46216
IB7	IB	2.12248	4.15657	0.586399	8.91266e-07	0.632953	1.43204	14.7194	11.9171	0.972707	1.42054	10.5289	7.23183	2.04714	107.523	25.0001	60.1914	80.6214	29.0112	31.4811	11.0513	9.28539	3.96024	6.79183	7.50187	7.22305	45.6003	4.17542	3.75347	3.34917	26.2149	366.959	3.99068	38.3009	1276.31	728.447	31.356	375.003	18.3718	9.94982	81.2271	116.966	10.8917	5.64067	36.0782	9.29379	21.3268	273.12	3.88614
IB8	IB	1.1865	3.88498	1.48249	9.82318e-07	0.906339	1.57333	26.1819	8.18201	1.65419	1.89239	10.9881	5.63045	1.71433	128.096	30.6128	65.6638	54.1124	12.7903	16.3678	3.72539	10.0945	2.64886	8.21342	6.71956	3.93241	44.3661	4.45826	2.08942	4.48264	134.579	2288.12	6.45891	44.8472	793.361	654.191	89.7466	204.864	51.4575	39.7796	18.0852	68.3211	28.8847	4.76898	42.2039	34.3294	28.341	198.284	16.5979
IB9	IB	1.85772	3.95798	0.78665	1.00806e-06	0.579965	1.78968	9.77345	10.3771	0.476688	0.926723	7.59113	3.17632	1.38633	54.3492	13.2587	30.3151	23.4645	7.23363	10.4677	2.96437	14.9167	1.74368	4.12193	7.83078	10.4818	34.4699	0.967649	10.9693	1.91602	79.0979	1139.4	8.74752	5.03198	801.455	487.469	58.4672	242.366	32.609	26.903	64.776	91.9772	19.2968	8.71021	46.0781	25.3576	32.7484	202.826	10.8064
IB10	IB	4.25029	5.33755	1.61694	1.13895e-06	1.57544	2.9295	23.4246	15.3058	1.7451	2.53093	14.2579	7.36065	2.3816	139.496	34.9741	76.3713	59.3967	16.9252	15.7534	7.01059	14.1036	4.13144	9.28531	15.7127	13.4368	45.9221	2.82118	9.19168	5.62605	49.019	1026.18	7.27095	21.3919	1581.53	1016.34	51.3179	417.769	27.806	16.1838	83.7079	155.927	15.6746	11.2544	78.8686	1.76762	52.0228	708.105	8.35975
IB11	IB	2.22508	3.3371	1.10774	0.269828	0.901633	2.24718	15.2433	15.286	0.908161	1.50379	7.25708	4.07449	1.30242	99.5251	21.9256	56.3805	43.0931	17.1494	10.0854	5.5686	14.1777	3.02102	5.93641	10.1923	17.3133	37.0731	2.98745	7.3789	2.79476	11.8636	629.472	5.0132	33.2527	1837.41	1032.4	21.2082	434.328	11.7773	7.27747	107.054	149.508	7.26468	8.06313	77.3147	7.50078	36.9567	536.827	4.0447
IB12	IB	0.0510346	2.98718	1.2086	6.92521e-07	0.815549	1.85954	14.0255	6.42297	0.925218	1.25111	11.8058	5.07295	1.86678	73.821	17.8816	59.9706	44.495	14.8244	12.6855	4.69375	6.89812	3.21593	7.41812	6.90225	7.44712	26.9086	2.5078	4.9908	2.98708	5.25131	258.757	3.96966	26.1838	729.246	441.113	13.8543	193.447	7.53087	5.22042	29.1735	61.0324	4.59529	4.27417	42.1414	4.01701	28.7229	621.101	2.61982
IB13	IB	0.433153	3.76278	0.576725	0.205482	1.18227	2.0548	9.30326	8.69377	0.617402	1.13498	5.95012	2.96038	0.948356	42.3069	10.8085	31.4986	19.1142	6.59814	6.63684	2.49318	9.37477	1.57192	3.10843	5.33235	5.23769	27.4408	0.95004	4.22311	1.90376	31.8362	1147.5	4.38529	16.4256	866.05	477.226	40.0719	314.149	21.3706	13.355	65.8537	86.2776	12.8191	7.35291	50.4292	12.9358	27.9981	175.5	7.09693
IB14	IB	0.156611	4.6008	1.26352	1.19048e-06	0.544019	1.31501	20.4385	9.37918	1.01922	1.93106	8.98546	3.91882	1.02549	105.71	20.234	61.7535	40.3649	17.9031	9.65775	4.8697	8.27996	2.58827	5.54135	9.10609	5.46378	40.4926	5.30211	4.75983	2.47732	11.0196	373.919	4.78632	34.8241	964.652	613.423	16.5382	306.308	7.91308	5.35131	44.1171	112.2	4.7217	5.51759	50.2067	4.88773	39.7069	287.963	2.81069
IB15	IB	5.72693	4.35203	0.905753	1.0917e-06	0.440758	2.10215	20.7687	11.9209	1.19908	1.70542	12.8294	5.23449	1.45192	106.586	22.9937	68.7016	40.0977	17.9032	10.7649	5.18619	9.84128	3.53394	6.52462	9.85347	7.46299	49.3476	3.00145	6.39768	3.53231	19.8851	1090.45	7.36892	35.085	1090.82	701.797	28.0134	284.89	14.2831	11.4443	54.7089	112.244	8.33452	6.26736	68.5539	11.0798	53.5055	310.14	7.42225
																																																Sample ID
																																																Group
																																																6-keto-PGF1a
																																																TXB2
																																																PGF2a
																																																PGE2
																																																PGD2
																																																LXA4
																																																15,16-DiHODE
																																																8,15-DiHETE
																																																9,10-DiHODE
																																																12,13-DiHODE
																																																17,18-DiHETE
																																																14,15-DiHETE
																																																11,12-DiHETE
																																																12,13-DiHOME
																																																9,10-DiHOME
																																																19,20-DiHDPE
																																																14,15-DiHETrE
																																																16,17-DiHDPE
																																																11,12-DiHETrE
																																																13,14-DiHDPE
																																																9-HOTrE
																																																10,11-DiHDPE
																																																8,9-DiHETrE
																																																EKODE
																																																13-HOTrE
																																																15-deoxy-PGJ2
																																																20-HETE
																																																15-HEPE
																																																5,6-DiHETrE
																																																8-HEPE
																																																12-HEPE
																																																5-HEPE
																																																4,5-DiHDPE
																																																13-HODE
																																																9-HODE
																																																15(16)-EpODE
																																																15-HETE
																																																9(10)-EpODE
																																																17(18)-EpETE
																																																17-HDoHE
																																																11-HETE
																																																12(13)-EpODE
																																																15-oxo-ETE
																																																9-oxo-ODE
																																																14(15)-EpETE
																																																8-HETE
																																																12-HETE
																																																11(12)-EpETE
																																																8(9)-EpETE
																																																9-HETE
																																																15(S)-HETrE
																																																12-oxo-ETE
																																																5-HETE
																																																19(20)-EpDPE
																																																12(13)-EpOME
																																																14(15)-EpETrE
																																																9(10)-EpOME
																																																16(17)-EpDPE
																																																13(14)-EpDPE
																																																5-oxo-ETE
																																																10(11)-EpDPE
																																																11(12)-EpETrE
																																																7(8)-EpDPE
																																																8(9)-EpETrE
																																																8(9)-EpETrE alt
																																																5(6)-EpETrE
[truncated: 18 more columns]

## Sheet: Normalized data
Sample ID	Group	Sex	6-keto-PGF1a	TXB2	9,12,13-TriHOME	9,10,13-TriHOME	PGF2a	PGE2	PGD2	LXA4	15,16-DiHODE	8,15-DiHETE	9,10-DiHODE	12,13-DiHODE	17,18-DiHETE	14,15-DiHETE	11,12-DiHETE	12,13-DiHOME	9,10-DiHOME	19,20-DiHDPE	14,15-DiHETrE	16,17-DiHDPE	11,12-DiHETrE	13,14-DiHDPE	9-HOTrE	10,11-DiHDPE	8,9-DiHETrE	EKODE	13-HOTrE	15-deoxy-PGJ2	7,8-DiHDPE	20-HETE	15-HEPE	5,6-DiHETrE	8-HEPE	12-HEPE	5-HEPE	4,5-DiHDPE	13-HODE	9-HODE	15(16)-EpODE	15-HETE	9(10)-EpODE	17(18)-EpETE	17-HDoHE	11-HETE	12(13)-EpODE	13-oxo-ODE	15-oxo-ETE
IB-1.F	IB	F	0.997362	2.33747	9.84334	9.19056	1.18236	1.28311	0.87185	2.32643	5.19438	3.67911	1.77651	2.08999	3.47245	2.69241	1.91671	7.1538	4.76844	5.73372	5.35847	3.54622	4.51314	2.86033	4.44366	2.80954	4.02184	5.55259	4.9332	4.46211	2.29093	1.50273	3.74686	2.37218	3.49921	5.02683	3.13932	1.40312	10.2705	10.1276	3.41693	8.33042	2.78367	1.97196	5.66385	7.45526	2.19498	3.62726	4.78636
IB-2.F	IB	F	3.34993	2.23728	9.91739	9.13258	1.2802	0.694785	1.20137	2.80072	4.5475	4.15409	1.68157	2.34295	2.77394	2.40015	1.76559	6.31709	4.46796	4.69088	4.44784	3.18849	3.63346	2.43881	5.42139	2.42583	3.67154	5.63126	5.87782	4.01864	2.28926	1.55533	5.41126	2.23659	3.99388	6.31537	4.11974	0.652353	10.3644	10.0924	3.48274	8.56986	2.527	1.91778	6.93496	7.87559	2.08347	3.72062	5.04876
IB-3.F	IB	F	1.60592	3.7887	9.97577	9.71838	2.29441	1.23164	1.69669	2.44426	3.38051	2.83615	1.24993	1.45811	3.87383	2.91177	2.05305	3.36604	4.30775	3.82879	4.04293	3.67708	4.73542	3.19969	5.29625	3.13956	4.57252	3.75274	6.40002	4.93046	2.42998	2.11468	10.1879	1.34114	6.33597	8.79347	4.63536	0.233461	8.22546	7.70163	1.88101	11.2778	1.53734	1.39166	10.1906	10.1403	2.17211	1.51908	5.47264
IB-4.F	IB	F	2.86207	2.30785	9.31656	8.72643	0.643433	1.30118	1.00342	2.1517	5.34612	4.02541	1.52631	1.84694	3.06982	2.06872	1.45211	6.54387	4.50038	5.62509	4.80318	3.43404	4.14659	2.73909	4.8817	2.66723	3.61661	4.93793	5.77627	3.93067	2.20941	1.73213	5.0091	2.0462	4.62828	7.03548	3.92667	2.30936	10.117	9.85666	4.36963	8.72846	3.20928	2.68186	6.48788	8.02091	2.93231	3.69163	4.08491
IB-5.F	IB	F	3.51265	3.10408	9.66859	8.94117	2.53178	1.50911	1.12124	1.97865	5.52919	4.32239	1.56325	2.15594	3.98478	2.85765	1.69627	7.14236	4.82641	6.4411	5.7089	4.29017	4.77107	3.61308	4.32503	3.09795	4.14346	4.66455	5.34282	4.27683	1.85617	1.63992	4.0878	2.50062	3.4536	5.19432	3.3517	3.78282	10.1551	9.599	3.11523	8.51131	2.27727	1.68137	5.90116	7.17694	1.68869	2.4195	4.00551
IB-6.F	IB	F	2.81066	3.95428	10.2897	9.51235	1.59333	1.29984	1.09326	2.19331	6.05907	3.9141	1.82032	2.4842	3.45433	2.61694	1.55818	6.61967	4.64414	5.28533	4.83148	3.51838	4.20278	2.72352	5.28249	2.66551	4.02309	6.11409	7.11781	5.05126	1.84247	1.39144	6.20589	2.02793	4.59696	6.11916	3.90722	1.25037	10.0081	9.02169	4.44086	9.07887	2.72084	1.62428	7.44788	8.15421	2.43107	3.84872	5.50243
IB-7.F	IB	F	2.38065	2.36296	10.052	9.25343	1.5754	0.956663	1.17828	1.88246	5.7248	5.06995	1.72489	2.54865	4.3943	3.49543	2.04065	7.16879	5.10783	6.07367	6.28219	4.59305	5.12089	3.576	3.89097	2.44744	3.75793	4.01262	4.87806	5.16139	1.49902	2.13072	4.2303	2.44992	2.50452	5.32026	3.66519	4.1801	10.3334	9.4999	3.18508	9.15493	2.24374	1.62073	6.15813	7.97371	1.74751	2.36115	4.66394
IB-8.F	IB	F	2.51876	2.89838	10.0111	9.20085	1.30319	0.96752	1.24175	1.80304	5.41019	4.29631	1.50583	2.08186	4.11516	2.94872	1.82858	6.86276	4.69845	5.59978	5.30561	3.72549	4.37356	2.73381	3.71376	2.40935	3.82674	4.1984	4.49442	4.88942	1.76123	1.95993	4.33205	2.2523	3.79719	5.99258	3.51074	2.6841	10.3083	9.28774	3.78964	9.26317	2.67265	2.20785	6.02465	7.85669	2.08089	2.6056	4.52704
IB-9.F	IB	F	2.81957	2.04129	9.0979	8.25594	0.686367	0.470189	0.61448	1.64594	5.11089	2.96191	1.40296	1.68613	4.44704	3.38663	2.73073	6.89174	4.75439	6.19299	5.93004	3.96133	4.99463	3.57119	3.35395	3.12437	3.95255	4.20383	4.77527	3.84782	1.81646	1.42628	4.1443	2.2645	3.9788	6.23214	3.03036	3.21242	10.2471	9.20303	3.51622	8.7369	2.47223	2.2249	6.08499	7.1421	1.9066	2.89482	4.31171
IB-10.F	IB	F	0.977618	2.48237	9.64288	9.05069	1.92991	0.96828	1.02057	2.19273	5.70014	4.09357	1.6857	2.0797	4.5744	3.35416	2.31041	6.00383	4.83009	5.70704	5.45535	4.8813	5.39406	3.90793	4.58447	2.94256	4.05564	3.8293	4.36896	4.79936	1.82866	1.55348	5.35001	2.14394	3.77965	7.428	4.09908	2.92879	10.1555	9.01502	3.70195	9.94499	2.31977	1.53637	7.49593	8.3013	2.03159	1.9504	4.50726
IB-11.F	IB	F	3.45933	2.40237	10.0835	9.32801	2.05213	1.10636	1.68222	2.23574	4.96092	4.90787	1.76097	2.0435	4.56489	3.18151	2.25631	6.70578	5.02064	6.42566	6.20612	4.55844	5.30761	3.75906	4.27627	3.16872	4.48513	4.99601	4.42658	4.61677	2.11544	2.11702	4.14098	2.90684	0.734911	6.68905	3.58658	3.26878	10.2665	9.30048	2.57129	9.37253	1.74621	1.38818	6.28936	7.86293	1.35507	0.946449	5.12327
IB-12.F	IB	F	3.31813	2.54823	13.14	12.5004	2.17744	0.878244	1.73084	3.72064	4.90399	3.75781	1.3129	1.63745	4.23591	2.36679	1.66302	4.47264	4.29266	5.55985	5.42737	4.87022	5.17534	4.23159	4.37653	3.45015	4.4899	3.13264	4.93422	4.88973	1.91217	2.51175	8.35157	1.29014	3.3975	8.33478	4.51248	0.815197	8.87802	7.55505	3.03572	10.502	1.8177	0.768849	8.48397	8.77	1.77622	2.55786	5.13343
IB-13.F	IB	F	2.47029	2.93273	9.85079	9.11711	2.27753	0.836171	1.59761	1.92494	5.60292	4.53836	1.62484	2.17692	4.50566	3.35087	2.00267	7.11352	5.11629	6.16296	6.16758	4.73226	5.48242	3.94575	4.22127	2.88215	4.31562	4.31175	4.51097	5.7187	1.80224	1.95169	4.89748	2.36369	3.01343	4.83874	3.95164	3.17866	9.97655	9.08421	3.25512	9.31367	2.23578	1.65676	6.62545	7.84133	1.75058	1.75157	4.5644
IB-14.F	IB	F	0.912381	2.339	9.57612	8.81684	1.0757	0.513872	0.89474	2.34015	5.05957	2.12778	1.30604	1.6304	3.3858	2.40105	1.50842	6.8418	4.33029	5.98311	5.27959	3.92495	4.22746	2.79539	3.45578	2.26866	3.33786	4.31538	3.60662	3.74694	1.72427	1.11548	3.60649	2.05879	4.33538	5.72899	2.98184	2.93605	9.98561	8.95155	4.73376	8.76527	3.71133	2.89222	5.99466	6.59423	3.11909	3.02087	4.01954
IB-15.F	IB	F	0.879805	2.36435	10.3926	9.44366	0.932746	0.738315	1.04122	2.1977	5.05065	3.19543	1.00319	1.39016	3.91668	2.89456	2.10352	6.40028	4.12636	6.21652	5.91022	4.12958	4.91668	3.47411	3.69947	2.85912	3.61763	4.51477	3.8169	4.96675	1.67247	2.02183	4.25407	1.87658	4.18118	4.6648	3.54607	2.41709	10.1531	9.29213	3.5076	9.08304	2.57635	2.47469	5.96304	7.58618	1.9445	2.52033	4.64597
C-1.F	CTR	F	6.68217	3.37028	9.52118	8.8676	3.00312	1.29492	2.06868	1.79326	6.25693	3.06797	1.92783	2.47286	3.17423	2.17242	1.66015	7.2142	4.74752	5.04776	5.02071	3.06085	3.73973	2.11356	4.71337	2.05754	3.26822	5.63152	5.39561	4.63992	1.56717	1.27473	4.80137	1.66304	3.97141	2.88701	4.10457	1.30381	10.5407	9.39878	5.22835	8.5775	3.27276	2.49139	6.48735	7.5603	3.03509	3.6606	4.45967
C-2.F	CTR	F	6.82324	4.88966	10.6196	9.71958	5.62522	2.50239	3.48064	2.09864	4.8622	3.53683	1.5252	1.72605	3.34325	2.5909	1.29214	6.98457	4.81851	6.31982	5.61055	4.02621	4.203	2.95784	4.23393	2.34872	3.3562	5.06969	5.15898	4.96074	1.59012	1.75933	4.23234	2.18359	3.78404	3.70532	3.71142	3.83175	10.1079	9.54637	3.55995	8.73164	2.78775	1.87169	6.40971	7.48759	2.18762	2.77416	4.88126
C-3.F	CTR	F	4.34801	3.2453	12.571	11.8826	1.96148	1.19114	2.09767	2.56679	4.61599	3.20413	1.51468	1.97133	3.29187	2.3678	1.51137	6.24574	5.00791	4.60543	4.7091	3.52812	4.11904	2.63184	4.90518	2.31085	3.48637	5.73208	4.94038	4.22472	1.34038	1.98104	7.45804	1.53893	5.01121	6.17923	5.84853	0.833617	9.44214	8.71383	5.10797	9.7731	2.59028	2.2411	9.06051	8.79889	2.31435	2.46253	4.82985
C-4.F	CTR	F	7.85796	5.37712	11.929	11.1413	5.37527	2.81661	3.38283	2.96481	5.0581	3.34557	1.37869	2.02847	3.43351	2.24226	1.36655	5.86	4.40058	5.28654	5.11324	4.09899	4.44482	2.98269	4.07935	2.17541	3.37276	4.80521	5.2271	3.97993	1.50299	1.6347	6.51062	1.39507	5.23798	8.66222	4.81886	1.93451	9.40099	8.59853	2.90032	9.77901	1.94972	1.22053	8.22295	8.57049	1.39819	1.89787	4.54599
C-5.F	CTR	F	7.46227	5.13867	9.7817	8.88779	5.71668	3.11821	4.10969	1.6073	5.4487	3.77843	1.55306	1.95414	3.84041	2.62071	1.77304	6.99725	4.84553	6.07661	5.40536	4.1828	4.40302	3.09721	3.80314	2.45646	3.31279	5.151	4.68375	4.32855	2.33291	1.14125	4.37326	2.12105	3.54281	5.64086	3.46945	4.22374	10.1513	9.51402	4.14979	8.65936	2.91477	2.26123	7.09189	7.53894	2.51904	3.25182	4.40786
C-6.F	CTR	F	6.95849	4.37636	9.97436	9.01076	5.1057	2.59047	3.22173	1.60034	4.97611	3.55894	1.15197	1.52132	2.35739	1.38045	0.710176	6.26382	4.42332	4.74047	4.10332	2.84552	3.5219	2.0541	3.4517	1.81317	2.9485	3.94166	4.12341	3.32267	1.56095	0.561258	3.86732	1.54677	4.27904	6.16211	2.82616	1.92719	9.70828	8.94086	4.71156	8.74024	3.70374	2.92516	5.75592	7.80868	3.16567	3.70489	3.35483
C-7.F	CTR	F	8.0918	6.04054	9.88503	9.16714	6.60062	3.34482	4.07909	1.87286	5.6986	3.9243	1.90275	2.81997	3.51453	2.28669	1.51796	6.66312	4.67016	5.58501	5.20227	3.89865	4.29603	2.9809	4.27705	2.42869	3.79161	4.21995	5.02717	4.90536	1.66312	1.41779	4.48771	1.77578	0.32752	6.60867	3.80772	3.10586	9.93363	8.74152	3.96416	9.11234	2.3142	1.76037	7.25698	8.12187	1.82125	1.58598	5.00417
C-8.F	CTR	F	5.48006	2.30301	11.122	10.3855	1.68951	1.53246	1.41409	3.0143	4.76424	4.61814	2.13547	2.92759	3.73137	2.68515	1.63933	6.50875	5.49503	4.62409	3.96511	3.72041	3.67835	3.05228	6.08923	3.02099	4.10815	5.33299	6.3446	4.33308	1.59049	1.24102	6.43764	2.00504	0.532864	6.66449	4.76407	0.961548	9.97443	9.20082	4.40263	9.35507	2.14644	1.25867	8.46419	8.51236	1.77529	3.34946	5.66692
C-9.F	CTR	F	8.2705	6.3099	9.97971	9.15318	6.99608	3.81976	4.88238	2.09332	5.47688	4.31469	1.19861	1.66861	4.03822	2.66924	1.7212	6.41908	4.32923	5.50708	5.47332	3.94913	4.62305	3.2502	3.561	2.65587	3.76652	4.72529	3.6645	5.09187	1.69895	1.32372	4.37472	2.36119	2.49393	6.15251	3.67797	3.83166	9.64136	9.03215	3.37395	9.36828	2.41522	2.23201	5.77478	8.28593	1.74596	1.90562	4.79276
C-10.F	CTR	F	6.69762	4.54423	9.76354	8.82607	5.8058	2.69725	3.28364	1.53938	5.33639	3.11503	1.44502	1.67308	3.7066	3.10256	1.74834	6.90004	4.86346	6.55154	6.68233	4.71348	5.13199	3.68262	3.2689	2.55878	3.49995	5.14723	3.76268	4.4845	1.57523	1.94256	3.21287	1.98582	-0.127254	5.13899	2.93211	4.90449	9.93554	9.16373	3.23564	8.79696	2.33941	1.58424	5.48124	7.43438	1.87962	1.75238	4.4265
C-11.F	CTR	F	7.57287	5.11873	10.353	9.54126	5.94295	3.04072	3.87708	1.90409	6.07097	3.29053	1.49458	2.24643	3.93309	2.69058	1.85823	6.95652	4.71533	6.06183	5.76625	3.86058	4.79146	3.25391	3.94585	2.39257	3.59913	5.33335	4.62636	5.77417	1.22526	1.58131	3.95501	1.8432	0.642176	8.51025	3.45478	3.12341	10.0677	9.22822	3.95551	8.92361	2.75938	1.72696	5.58403	7.85103	2.07154	1.83777	4.71723
C-12.F	CTR	F	8.1403	6.63308	9.47265	8.55316	7.43219	3.80812	4.97549	1.6416	5.47576	3.48909	1.44319	1.88809	3.75569	2.57147	1.57654	6.53628	4.81562	6.23944	5.95175	4.13935	4.5273	3.60079	3.29361	2.77455	3.73322	4.05913	3.77833	5.34628	1.74648	1.62403	3.58876	2.23802	2.97621	7.5649	3.30287	5.27028	10.0548	9.27685	3.68602	8.96726	2.8704	1.92972	4.99829	7.89055	1.93039	2.27101	4.10964
C-1.M	CTR	M	7.568	4.41286	-1.13995	-1.07592	4.61889	4.62287	3.89759	1.63778	7.43432	3.018	4.53994	5.58552	2.70718	1.71796	0.76981	8.9939	6.70005	5.21728	5.05696	3.61126	3.6102	2.30854	5.85446	1.95946	3.07338	4.75389	5.73029	4.83451	-0.357567	1.41885	3.04786	2.1891	2.79861	7.36813	3.60961	2.48263	10.7302	10.3675	5.85027	8.1149	3.87689	2.26742	6.16116	6.86108	3.31641	-0.485598	3.53969
C-2.M	CTR	M	7.25986	5.90653	0.301471	0.223705	6.71051	2.65765	3.69959	1.29323	4.74938	2.86813	2.19098	1.50948	3.99102	3.05245	2.0158	7.19351	5.80369	6.39695	6.55904	4.18847	5.10894	2.67084	3.83265	2.53469	4.13705	3.63785	3.72508	6.19345	-0.0148448	2.82666	2.625	2.85868	3.48415	6.40946	2.43269	6.87598	10.3393	10.0866	3.7627	8.0244	2.7944	1.90193	5.90959	7.06639	2.05528	-0.0318314	2.85665
C-3.M	CTR	M	8.24643	6.34588	1.4536	1.44525	6.49812	2.5963	4.03268	2.02519	5.76037	4.81286	1.66127	2.30946	4.66443	2.97113	1.7942	8.06765	5.28315	6.96235	6.14514	5.05654	4.63899	3.17247	5.17408	2.33646	3.3088	4.24496	5.37112	6.25693	0.519022	1.97235	4.46296	1.99406	1.97311	6.54031	3.77275	4.97177	10.7347	10.5174	3.7012	8.59984	2.30717	1.74635	7.19826	7.88022	1.75399	0.622644	3.44542
C-4.M	CTR	M	8.09544	6.00829	1.65424	1.63049	6.80582	2.08482	3.85951	2.17607	5.80119	3.78472	1.68694	2.0339	5.1198	3.45103	2.00249	8.25277	5.94706	7.35911	7.02505	5.35764	5.50126	3.37121	4.70283	2.74589	4.17061	4.64746	4.78416	6.78216	0.428795	3.00385	3.92006	2.64341	1.27015	2.38528	3.57407	5.31376	10.4326	10.3138	2.97931	8.46845	1.60807	1.37976	6.35596	7.65481	1.349	0.526711	3.6292
C-5.M	CTR	M	6.9819	5.35199	0.773183	0.703223	6.26321	2.44094	3.35587	1.79777	5.01629	3.61401	1.04126	1.38198	3.68345	2.46377	1.35429	7.02979	4.6222	6.47223	5.79566	4.34226	4.1226	2.59153	4.08699	1.77263	2.75955	3.298	3.92173	6.17203	0.418511	2.00136	3.36941	2.07864	4.14836	8.02163	3.42108	5.42388	10.2882	9.96062	4.45995	7.98458	3.29603	2.57987	5.61919	7.02979	2.64779	0.404655	2.87432
C-6.M	CTR	M	6.9499	4.97118	0.910699	0.87654	5.42476	1.66636	2.65125	1.63703	5.3222	2.98366	1.51742	2.08518	4.01378	2.81193	1.63104	7.25889	4.94832	6.11592	5.82633	4.15314	3.80228	2.32869	3.97976	1.99014	3.02003	3.51407	4.27941	6.04007	0.38248	1.73076	3.60018	1.91741	3.96237	8.55756	2.96931	4.33868	10.4987	9.92525	4.67551	8.269	3.47094	2.36616	5.51996	7.09549	2.87131	0.403516	2.74534
C-7.M	CTR	M	6.27227	3.69285	0.195753	0.147463	4.35235	1.63056	2.78545	1.84229	4.38744	3.91132	1.04629	1.60882	3.43193	2.22711	1.33203	6.82939	4.40628	6.1165	5.43045	3.83237	3.67709	2.41354	4.20172	1.79614	2.62332	3.27598	3.61143	5.49433	0.365945	2.26849	3.33329	2.01129	4.02167	8.65483	2.99408	5.36503	10.4382	10.0502	4.26865	8.05836	3.21527	2.8035	5.73902	7.13052	2.73417	0.282568	3.02483
C-8.M	CTR	M	7.39546	4.90633	0.197942	0.147524	5.88692	1.84938	3.87915	1.58485	4.90752	3.33375	1.40138	1.82776	3.76915	2.44643	1.32068	7.09782	4.58208	6.23641	5.89474	4.15364	4.14087	2.51261	3.83992	1.86804	2.67274	3.29108	4.56426	5.07707	0.250655	2.34965	3.33544	1.96377	3.71979	7.89043	2.79174	5.05861	10.4372	9.96035	4.28529	8.08345	3.39266	2.49956	5.48339	7.04388	2.75368	0.220191	2.58749
C-9.M	CTR	M	6.99648	5.58905	0.297141	0.325449	6.34053	2.57	3.86431	1.65637	4.76124	3.72711	1.60152	1.94952	3.69892	2.45457	1.42349	7.16465	5.0624	6.23096	5.91919	4.60977	4.57167	3.06277	4.31462	2.15964	2.9302	3.94922	3.68588	5.03185	0.328286	2.29415	3.14816	2.04917	3.91784	6.73703	2.7312	5.96033	10.4262	10.1803	4.37205	8.22531	3.41583	2.00839	6.85284	7.26645	2.60174	0.303882	3.64594
C-10.M	CTR	M	7.87462	5.77663	0.948665	0.993359	7.11053	2.77564	3.7937	2.26739	5.16223	3.7828	1.44619	1.96147	4.65407	3.18146	1.92238	8.02045	5.30663	6.91593	6.69281	4.87805	5.09912	3.1858	4.73551	2.58041	3.64477	4.12192	4.62163	6.04926	0.623204	1.90744	4.24037	2.51544	2.3502	4.799	3.58818	5.62512	10.3698	10.1475	3.32366	8.41192	2.0583	1.34973	6.97675	7.71038	1.60862	0.690138	4.29813
C-11.M	CTR	M	8.03242	6.35896	0.513382	0.532954	6.46016	3.3047	4.50369	1.40188	5.5472	3.51638	2.01453	2.53379	3.79217	2.44483	1.37615	7.40845	5.33415	5.92198	5.15837	3.85967	3.59661	2.48809	4.33861	2.23743	3.04766	3.61132	4.2176	5.68882	0.100614	2.05633	3.35726	1.91854	3.49901	8.12633	2.74296	4.08032	10.4924	10.1656	4.58045	7.9202	3.44512	1.84086	6.15718	7.29332	2.79756	0.172681	3.10644
C-12.M	CTR	M	7.29471	4.7782	0.878918	0.898645	5.03635	2.14186	3.20211	2.11097	6.01383	5.11958	2.02821	2.5231	4.63292	3.25402	1.84304	8.03765	5.96023	6.51741	6.10116	4.71715	4.75374	3.22429	5.15488	2.69382	3.72767	4.1738	4.57261	6.68989	0.221425	2.54115	3.72352	2.60435	2.18039	6.81479	3.34729	5.72715	10.7303	10.3001	3.46993	8.89221	1.87923	1.54309	7.17458	7.9053	1.29124	0.278541	3.22564
C-13.M	CTR	M	8.79019	6.15537	0.95442	1.0088	7.35039	2.99066	5.17252	1.70175	5.96164	4.26791	1.68745	2.12962	4.86212	3.16557	1.83745	8.14344	5.47712	7.00464	6.2035	5.09223	4.86458	3.54629	4.23286	2.91875	4.11069	3.95785	4.11207	5.41674	0.302483	3.09503	3.90342	2.68172	2.38207	3.49443	3.52777	5.28775	10.4038	10.2397	3.40092	8.56227	1.87327	1.05993	6.83446	8.17041	1.58434	0.404026	3.61923
IB1.M	IB	M	4.10817	3.21642	0.601931	0.689285	2.31517	0.933136	1.28462	1.83451	5.3804	3.73101	1.78944	2.06477	5.10276	3.81131	2.3814	7.94655	5.3308	6.70222	6.28678	4.93139	5.14189	3.52907	4.27874	2.97886	4.28565	4.36184	4.64149	6.03647	0.240151	2.46876	4.60737	3.1127	2.26131	7.17576	3.98447	6.00397	10.2723	9.60205	3.70513	8.33256	2.11894	2.37403	6.01926	7.03272	1.91483	0.322938	3.70487
IB2.M	IB	M	1.77758	2.63459	0.917876	0.886683	1.42287	0.549563	1.33681	1.997	4.67138	3.86637	1.13049	1.46135	4.23446	2.99811	1.87212	6.37018	4.46889	6.09165	5.55907	4.19128	4.18285	2.73986	4.06236	2.22008	2.92158	3.33311	3.63178	6.07196	0.607933	1.67318	3.36801	1.95345	4.72047	9.539	3.26606	4.03866	10.4996	9.48113	4.82257	8.7643	3.61508	3.26171	6.23114	6.93068	2.95961	0.561358	3.19198
IB3.M	IB	M	0.466584	2.55656	0.276641	0.333819	1.69971	0.613391	1.1712	1.85633	5.04229	4.80239	1.64369	2.10192	4.34867	3.57865	2.00582	7.23354	5.32814	6.26138	6.20553	4.91821	4.82219	3.65565	4.1028	2.78759	3.62552	3.63727	4.00344	6.37595	0.22023	2.46723	2.98628	2.54299	2.55107	7.24484	3.34144	5.6024	10.4426	9.63545	3.7643	8.8863	2.82649	2.57948	6.51888	7.2758	2.22525	0.237751	3.09097
IB4.M	IB	M	3.4584	3.95095	1.03514	1.10473	2.21023	0.756592	1.89185	2.47462	6.01817	4.34653	2.06117	2.49232	4.1009	2.94269	1.79615	7.82721	5.78693	6.58955	6.01942	4.51087	4.63203	3.04121	3.88471	2.87257	4.16931	4.73543	4.03516	5.84087	0.535763	3.87942	2.95865	2.90749	3.35013	5.00771	2.80212	5.52361	10.1875	9.45987	3.89518	8.66444	2.38223	1.79415	5.43508	6.65323	2.07079	0.696635	3.81482
IB5.M	IB	M	2.65202	2.43263	0.100586	0.114612	0.825423	0.332931	0.895278	1.39032	4.58004	3.22725	1.3654	1.5913	4.17521	2.88911	1.97103	6.40783	4.91984	6.13695	5.9158	4.40855	4.30884	2.55214	3.2306	2.61535	3.29141	3.40726	4.18026	5.56121	0.360844	2.58586	3.2149	2.39515	4.18216	9.02936	2.67944	4.82655	10.2836	9.24667	4.88524	8.12946	3.83596	3.27412	5.38005	6.48498	3.17302	0.233004	2.88601
IB6.M	IB	M	2.32367	2.5902	0.676622	0.650383	1.19639	0.63689	0.901259	1.60837	4.4997	3.68527	1.22449	1.59226	3.89808	2.69438	1.82251	6.50087	4.39408	5.75944	5.48281	3.91982	4.26458	2.72415	3.65491	2.29531	3.02033	3.43268	3.28608	5.3286	0.728197	1.43056	3.00293	2.02353	4.73031	9.14505	2.98785	3.84703	10.4671	9.66108	4.76601	8.22083	3.73868	3.24504	5.86327	6.70773	3.06215	0.658494	3.31186
IB7.M	IB	M	1.76331	2.23901	0.218836	0.181334	0.420943	0.177349	0.7112	1.34914	4.18501	3.55692	1.16016	1.33871	3.44118	2.93603	1.74379	6.44448	4.88062	5.88987	6.47904	4.9657	5.14135	3.3984	3.42567	2.27196	2.7274	3.15969	3.15956	5.75559	0.376629	2.44402	2.29912	2.1444	4.53511	8.27661	2.08806	5.19668	10.3807	9.48653	5.06279	8.47686	4.09139	3.44119	6.03776	6.74126	3.53501	0.225072	2.68715
IB8.M	IB	M	0.973417	1.83028	0.0491655	-0.0588163	0.667342	-0.209384	0.541202	1.03659	4.78112	2.73052	1.20179	1.20156	3.18633	2.23076	1.18643	6.36398	4.92077	5.74281	5.73041	3.58297	3.96891	1.6436	3.27455	1.43684	2.58276	2.761	2.15245	5.53485	0.0126417	2.12686	1.41574	2.08469	6.46776	10.6576	2.2799	5.10159	10.2332	9.69102	6.28852	7.79082	5.12602	4.94529	3.51313	5.8693	4.47227	-0.156451	2.18982
IB9.M	IB	M	1.69908	2.23652	0.304684	0.228737	0.68785	0.344125	0.816698	1.70488	3.70837	3.42752	0.909293	1.16703	3.0713	2.10547	1.55491	5.53738	4.06109	5.0019	4.84422	3.16671	3.70729	1.93431	4.12364	1.56853	2.19003	3.28447	3.70882	5.43887	0.546688	1.20708	3.69647	1.72207	6.15491	10.0216	3.13841	2.54866	10.3339	9.4186	6.00517	8.24539	5.0276	4.9429	5.73062	6.6069	4.45724	0.394418	3.28823
IB10.M	IB	M	1.82199	2.06967	-0.553692	-0.5697	0.808747	0.0808707	1.17642	1.88907	4.05628	3.43138	1.54146	1.72904	3.34788	2.70766	1.77915	6.12919	4.59797	5.49202	5.29951	3.61475	3.50424	2.53381	3.36713	2.10242	2.74978	3.51227	3.28894	5.00151	0.345876	1.85732	2.80099	2.57255	5.02727	9.06677	2.45817	3.89736	10.1823	9.4294	5.16125	8.05149	4.39027	3.88935	5.37356	6.47977	3.80513	0.147241	3.04675
IB11.M	IB	M	1.92202	2.24444	0.174549	0.207448	1.12681	0.691649	1.15089	1.96995	4.21155	4.15012	1.28099	1.59231	3.19411	2.48102	1.52218	6.50251	4.72712	5.84529	5.5586	4.39312	3.70618	2.79283	4.13729	2.19771	2.8594	3.70171	4.4302	5.4315	0.483202	2.27006	3.27446	2.16297	3.75514	9.15833	2.64903	5.23843	10.3926	9.61777	4.67927	8.4444	3.75801	3.26077	6.6209	7.06343	3.23837	0.379493	3.35022
IB12.M	IB	M	0.423454	2.38705	0.412923	0.366307	1.47912	0.390216	1.23988	1.89579	4.30795	3.28303	1.33564	1.55052	4.0789	2.97168	1.90426	6.5826	4.60282	6.3659	5.9762	4.38019	4.13196	2.85409	3.37483	2.45435	3.42607	3.37056	3.43543	5.21521	0.43343	2.19074	2.98352	2.3748	3.00272	8.38883	2.65655	5.15897	10.0478	9.29848	4.29548	8.08855	3.44002	3.0164	5.28601	6.3667	2.8628	0.398522	2.8123
IB13.M	IB	M	1.09082	2.5801	0.625669	0.579192	0.839557	0.652257	1.42468	1.93609	3.97467	3.59777	1.07783	1.4176	3.17072	2.23865	1.32207	5.46774	4.14043	5.39071	4.88294	3.4504	3.51056	2.00441	3.90477	1.64561	2.24356	3.2015	3.21817	5.44559	0.500898	1.29098	2.90133	1.84452	5.24672	10.287	2.63331	4.48182	10.3799	9.39631	5.8731	8.70232	4.6891	4.13652	6.09394	6.71632	4.07197	0.410412	3.47973
IB14.M	IB	M	0.464806	2.83488	0.199707	0.221398	1.48116	0.407639	0.994778	1.59226	4.63529	3.7253	1.42217	1.93191	3.6715	2.63732	1.41514	6.72737	4.629	6.03097	5.52615	4.56288	3.67908	2.86193	3.5324	2.20166	3.02913	3.64814	2.95688	5.58549	0.471337	3.0382	2.85511	2.17027	3.9129	8.60061	2.84269	5.51036	10.3654	9.61955	4.46426	8.53465	3.46748	3.03178	5.42147	6.96561	2.87521	0.421525	3.06258
IB15.M	IB	M	2.79101	2.44725	-0.00613761	-0.00497135	0.849469	0.230428	0.62078	1.77699	4.4419	3.71505	1.36942	1.57677	3.84267	2.64618	1.49186	6.60868	4.57902	6.02318	5.34685	4.33931	3.61252	2.56681	3.53464	2.24073	2.85225	3.53163	3.1362	5.6542	0.392056	2.14843	2.99012	2.29004	4.33092	10.0203	3.00061	5.21548	10.4447	9.71123	4.96344	8.3192	3.87785	3.71906	5.56553	6.84736	3.28382	0.268638	2.9427
[truncated: 23 more columns]

## Sheet: IB VS CTRL FEMALE
Lipid	logFC	P.Value	adj.P.Val
6-keto-PGF1a	-4.7071	8.80041e-18	6.16029e-16			bold-values that were found to be significant
PGD2	-2.20678	5.11966e-12	1.38517e-10
PGF2a	-3.53549	5.93642e-12	1.38517e-10
PGE2	-1.66272	3.0736e-09	5.37881e-08
TXB2	-2.10548	1.00764e-08	1.4107e-07
7,8-DiHDPE	0.320507	0.00582343	0.0660076
11,12-DiHETE	0.394495	0.00660076	0.0660076
10,11-DiHDPE	0.407744	0.0120468	0.105409
8,9-DiHETrE	0.472252	0.0168833	0.131314
14,15-DiHETE	0.413472	0.0268073	0.187651
9-oxo-ODE	-0.511695	0.0383754	0.244207
8-HEPE	1.02604	0.0456873	0.250618
11,12-DiHETrE	0.443034	0.0465433	0.250618
15(16)-EpODE	-0.556138	0.0567419	0.28371
17,18-DiHETE	0.407919	0.0730531	0.340914
5,6-DiHETrE	0.253967	0.100125	0.409464
EKODE	-0.384568	0.107464	0.409464
13,14-DiHDPE	0.333126	0.109158	0.409464
20-HETE	0.324735	0.11114	0.409464
5-oxo-ETE	0.612284	0.150155	0.525543
12-HETE	-0.433455	0.160891	0.536304
4,5-DiHDPE	-0.587477	0.188967	0.601259
9,12,13-TriHOME	-0.357186	0.23072	0.702191
LXA4	0.197837	0.248784	0.72562
16,17-DiHDPE	0.233391	0.278043	0.753087
19(20)-EpDPE	-0.255304	0.291694	0.753087
8,15-DiHETE	0.255046	0.299423	0.753087
5-HETE	0.162503	0.316755	0.753087
13-HOTrE	0.28959	0.327587	0.753087
15-HEPE	0.422103	0.358141	0.753087
9-HETE	0.393103	0.371621	0.753087
9-HOTrE	0.213006	0.376263	0.753087
15-HETE	0.176855	0.378871	0.753087
12,13-DiHOME	-0.255514	0.380446	0.753087
9,10,13-TriHOME	-0.24876	0.414	0.753087
9(10)-EpODE	-0.215264	0.421983	0.753087
8(9)-EpETE	-0.496651	0.425916	0.753087
9(10)-EpOME	-0.311281	0.428453	0.753087
11(12)-EpETE	0.185673	0.42916	0.753087
15(S)-HETrE	0.194539	0.430335	0.753087
12-oxo-ETE	-0.207453	0.443231	0.756737
8(9)-EpETrE	0.176894	0.460005	0.766675
5-HEPE	-0.162277	0.474136	0.771849
15,16-DiHODE	-0.164683	0.504047	0.787963
14,15-DiHETrE	0.16018	0.506548	0.787963
19,20-DiHDPE	0.147966	0.529913	0.806389
9,10-DiHOME	-0.108211	0.550886	0.820468
13(14)-EpDPE	0.124936	0.575646	0.829668
5(6)-EpETrE	-0.308869	0.580767	0.829668
7(8)-EpDPE	-0.197148	0.614852	0.836455
12(13)-EpOME	-0.193345	0.619617	0.836455
15-oxo-ETE	0.0934192	0.624587	0.836455
16(17)-EpDPE	0.101114	0.660185	0.836455
8(9)-EpETrE alt	0.108532	0.666667	0.836455
8-HETE	-0.144009	0.680258	0.836455
12,13-DiHODE	-0.0979696	0.682153	0.836455
13-oxo-ODE	0.0912168	0.700176	0.836455
17(18)-EpETE	-0.0892924	0.7181	0.836455
9-HODE	0.0595615	0.728979	0.836455
10(11)-EpDPE	0.080526	0.730059	0.836455
11-HETE	-0.071639	0.738477	0.836455
13-HODE	0.0497511	0.74086	0.836455
12(13)-EpODE	-0.0726884	0.765664	0.850737
14(15)-EpETE	-0.080105	0.783911	0.857402
14(15)-EpETrE	-0.0989388	0.827697	0.891366
17-HDoHE	0.0674469	0.859967	0.912086
12-HEPE	0.0912189	0.87829	0.917617
9,10-DiHODE	-0.0262395	0.89281	0.919069
11(12)-EpETrE	-0.0223002	0.9455	0.959202
15-deoxy-PGJ2	0.0044751	0.983513	0.983513

## Sheet: IB VS CTRL MALE
Lipid	logFC	P.Value	adj.P.Val
6-keto-PGF1a	-5.67073	1.08091e-21	7.56636e-20			bold-values that were found to be significant
PGF2a	-4.86399	2.1626e-17	7.56911e-16
PGD2	-2.66879	2.89248e-15	6.74912e-14
TXB2	-2.85413	5.91743e-13	1.03555e-11
PGE2	-2.1248	9.3578e-13	1.31009e-11
11(12)-EpETE	1.37971	1.29975e-07	1.51637e-06
17(18)-EpETE	1.44439	1.56741e-07	1.56741e-06
8(9)-EpETrE alt	1.37898	6.31269e-07	5.5236e-06
13(14)-EpDPE	1.11949	3.46415e-06	2.69434e-05
14(15)-EpETE	1.4421	4.7304e-06	3.03725e-05
10(11)-EpDPE	1.15134	4.77282e-06	3.03725e-05
19(20)-EpDPE	1.13161	1.14234e-05	6.1913e-05
16(17)-EpDPE	1.07893	1.14981e-05	6.1913e-05
8(9)-EpETrE	1.1054	1.46532e-05	7.3266e-05
11(12)-EpETrE	1.46678	2.35309e-05	0.000109811
12(13)-EpODE	0.941641	0.000211489	0.000925264
9-HODE	-0.653368	0.000258197	0.00106317
12,13-DiHOME	-1.07705	0.000350999	0.001365
12-HEPE	2.17468	0.000425485	0.00156758
15,16-DiHODE	-0.881792	0.000527889	0.00184761
14(15)-EpETrE	1.6167	0.000576696	0.00192232
9(10)-EpODE	0.941071	0.000648723	0.00206412
9,10-DiHOME	-0.583195	0.00166477	0.00499389
9-HOTrE	-0.770132	0.00171219	0.00499389
11-HETE	-0.676807	0.00202097	0.00565872
8(9)-EpETE	1.92816	0.00239039	0.00643566
13-HOTrE	-0.8488	0.00453086	0.0117467
7(8)-EpDPE	1.03413	0.00886531	0.0221026
15(16)-EpODE	0.755198	0.0091568	0.0221026
12,13-DiHODE	-0.610625	0.0112408	0.0262286
8-HEPE	1.22749	0.0154187	0.0348163
9,10-DiHODE	-0.46808	0.0166895	0.0357791
9-oxo-ODE	-0.581501	0.0168673	0.0357791
5(6)-EpETrE	1.26722	0.0234953	0.0483728
12(13)-EpOME	0.875814	0.0245608	0.0491216
9(10)-EpOME	0.870766	0.0264273	0.0513864
19,20-DiHDPE	-0.465666	0.0468195	0.0885775
17-HDoHE	-0.633627	0.0943838	0.173865
5-HEPE	-0.338643	0.129945	0.233235
EKODE	-0.344306	0.140005	0.245008
8,9-DiHETrE	-0.260167	0.170944	0.291855
14,15-DiHETrE	-0.311041	0.18998	0.31459
17,18-DiHETE	-0.287559	0.193425	0.31459
7,8-DiHDPE	0.142519	0.197742	0.31459
11,12-DiHETrE	-0.267853	0.213639	0.332328
5-HETE	-0.193241	0.224675	0.341897
15-HEPE	-0.519943	0.248365	0.369905
16,17-DiHDPE	-0.227758	0.279276	0.404491
13-HODE	-0.158722	0.283144	0.404491
12-HETE	0.318319	0.290753	0.407054
15-deoxy-PGJ2	-0.206636	0.33151	0.454694
11,12-DiHETE	0.131551	0.340222	0.454694
9,12,13-TriHOME	-0.275095	0.344269	0.454694
9,10,13-TriHOME	-0.275726	0.35516	0.460392
15-oxo-ETE	-0.152795	0.414229	0.5272
4,5-DiHDPE	-0.30346	0.485514	0.606893
13,14-DiHDPE	-0.114516	0.569601	0.699509
15-HETE	0.0987026	0.61486	0.742073
8-HETE	-0.163565	0.632449	0.750364
20-HETE	-0.0613746	0.755664	0.849376
9-HETE	0.128129	0.765245	0.849376
15(S)-HETrE	-0.0669852	0.78084	0.849376
14,15-DiHETE	0.0495553	0.781552	0.849376
5-oxo-ETE	-0.112754	0.784611	0.849376
8,15-DiHETE	-0.0641521	0.788706	0.849376
13-oxo-ODE	0.0549015	0.812665	0.861918
12-oxo-ETE	0.0472433	0.858002	0.8922
5,6-DiHETrE	0.0232677	0.876146	0.8922
LXA4	-0.025303	0.879454	0.8922
10,11-DiHDPE	-0.0171187	0.911705	0.911705
